# Supplementary material for: A peroxidase-like activity-based colorimetric sensor array of noble metal nanozymes to discriminate heavy metal ions
Source: Royal Society of Chemistry journal article supplement (doi:10.1039/d1an01895g), 2021-11-09
Supplement: d1an01895g1.pdf [file d1an01895g1.pdf]

## Supplementary data

### **The peroxidase-like activity-based colorimetric sensor array of noble metal nanozymes to discriminate heavy metal ions**

Hamada A. A. Noreldeen,<sup>a,b</sup> Liu Yang,<sup>a</sup> Xiao-Yun Guo,<sup>a</sup> Shao-Bin He,<sup>a,c</sup> Hua-Ping Peng,<sup>a</sup> Hao-Hua Deng,<sup>\*a</sup> and Wei Chen<sup>\*a</sup>

<sup>a</sup> Fujian Key Laboratory of Drug Target Discovery and Structural and Functional Research, School of Pharmacy, Fujian Medical University, Fuzhou 350004, China.

<sup>b</sup> Marine Chemistry Lab, Marine Environment Division, National Institute of Oceanography and Fisheries (NIOF), Egypt.

<sup>c</sup> Department of Pharmacy, the Second Affiliated Hospital of Fujian Medical University, Quanzhou 362000, China

\* Corresponding author. Tel./fax: +86 591 22862016.

E-mail address: chenandhu@163.com (W. Chen), DHH8908@163.com (H-H Deng).

## Reagents and materials

3, 3', 5, 5'-tetramethylbenzidine (TMB),  $\text{K}_2\text{OsCl}_6$ ,  $\text{H}_2\text{PtCl}_6$ ,  $\text{H}_2\text{AuCl}_4$ , and sodium borohydride ( $\text{NaBH}_4$ ) were purchased from Aladdin Reagent Co. (Shanghai, China) (<http://www.aladdin-e.com/>). Trisodium citrate dihydrate ( $\text{Na}_3\text{C}_6\text{H}_5\text{O}_7 \cdot 2\text{H}_2\text{O}$ ), and  $\text{H}_2\text{O}_2$  (30%, wt.) were obtained from Sigma-Aldrich Reagent Co. (Shanghai, China) (<https://www.sigmaaldrich.com/>). All other chemicals and solvents were at analytical grade or the highest purity available. All solutions were prepared using deionized water, to avoid possible interferences from other analytes.

## Instrumentation

Transmission electron microscopy (TEM) images were collected using a JEM-2100 microscope (JEOL, Japan). UV-vis absorption spectra were obtained with a UV-2600 UV-Vis spectrophotometer (Shimadzu, Japan). A microplate spectrophotometer (Epoch Microplate Spectrophotometer, BioTek Instruments, Inc.) was applied.

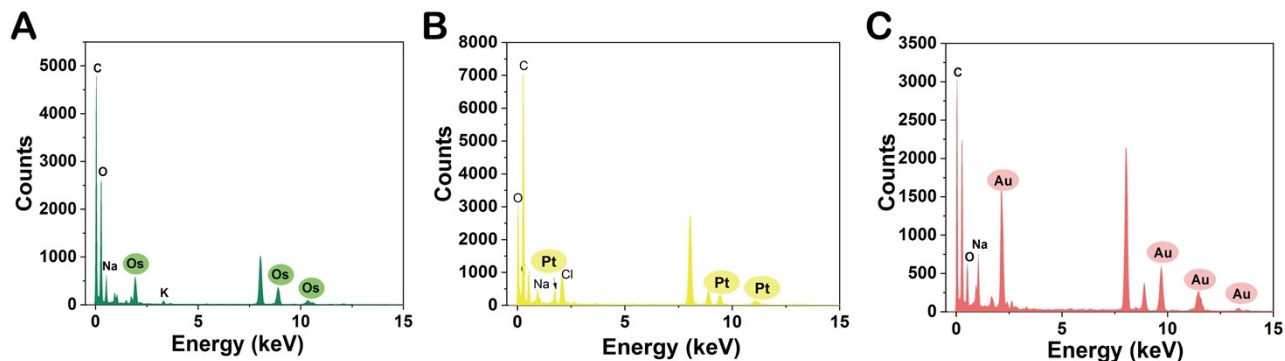

**Fig. S1.** EDS spectra of, (A) citrate-Os NPs, (B) citrate-Pt NPs, and (C) citrate-Au NPs.

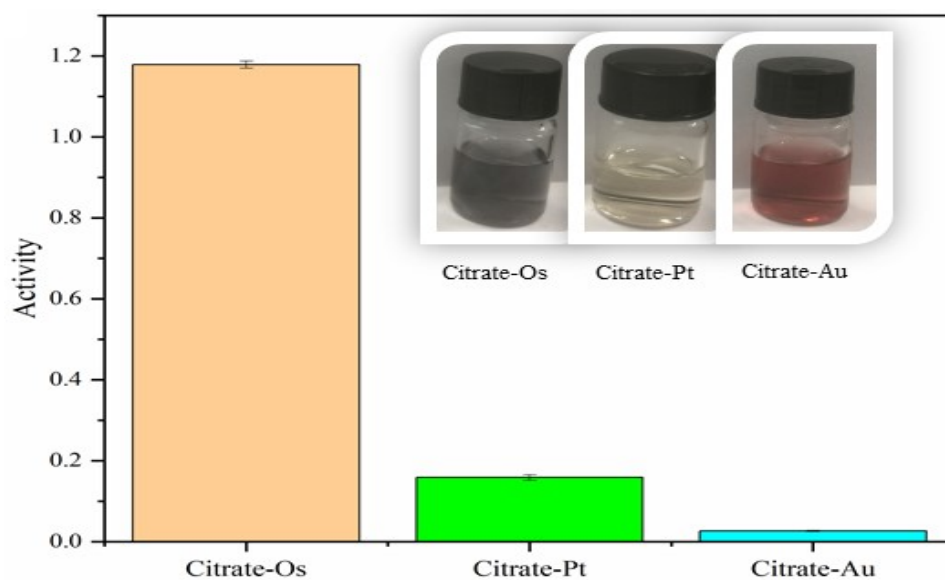

**Fig. S2** The typical peroxide-like activity of citrate-capped nanozymes. Inset: the corresponding images after about 50 days from the preparation. Each error bar shows the standard errors of three measurements.

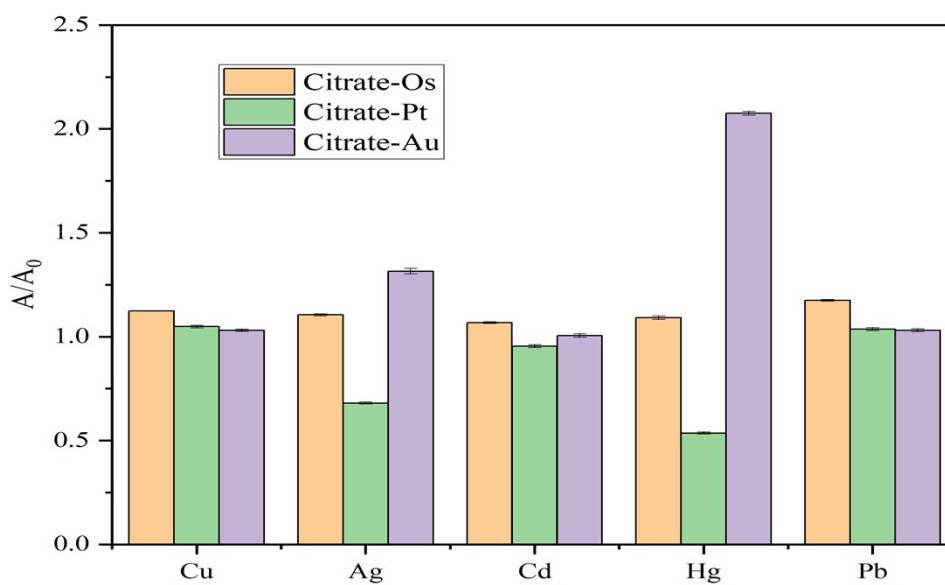

**Fig. S3** Colorimetric response patterns of the three nanozymes towards 5  $\mu$ M heavy metal ions.

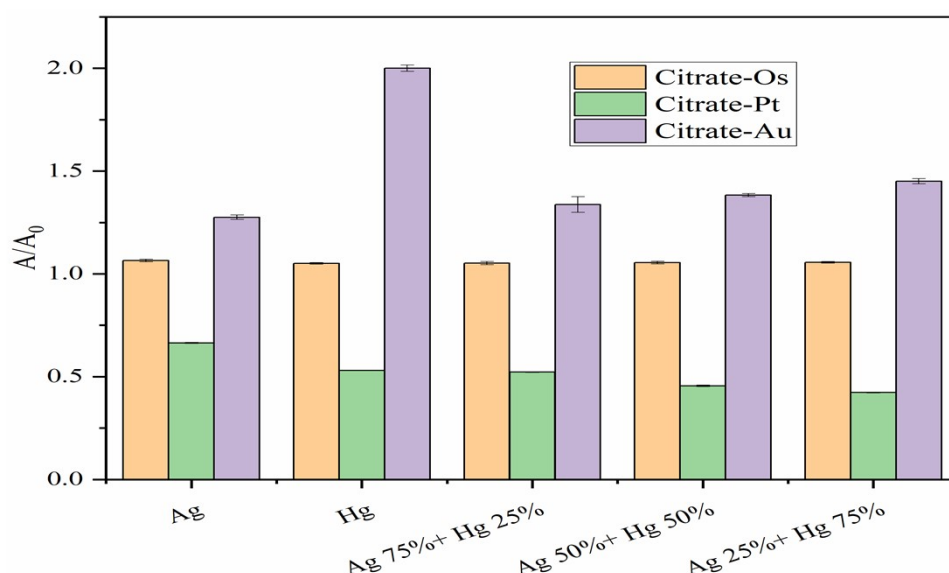

**Fig. S4** Colorimetric response patterns ( $A/A_0$ ) of nanozyme sensor array towards the mixtures of  $\text{Ag}^+$  and  $\text{Hg}^{2+}$  at different molar ratios in DI water. Each error bar shows the standard errors of five measurements.  $A$  and  $A_0$  were the absorption of oxidized TMB in the presence and absence of metal ions in the nanozyme reaction systems, respectively.

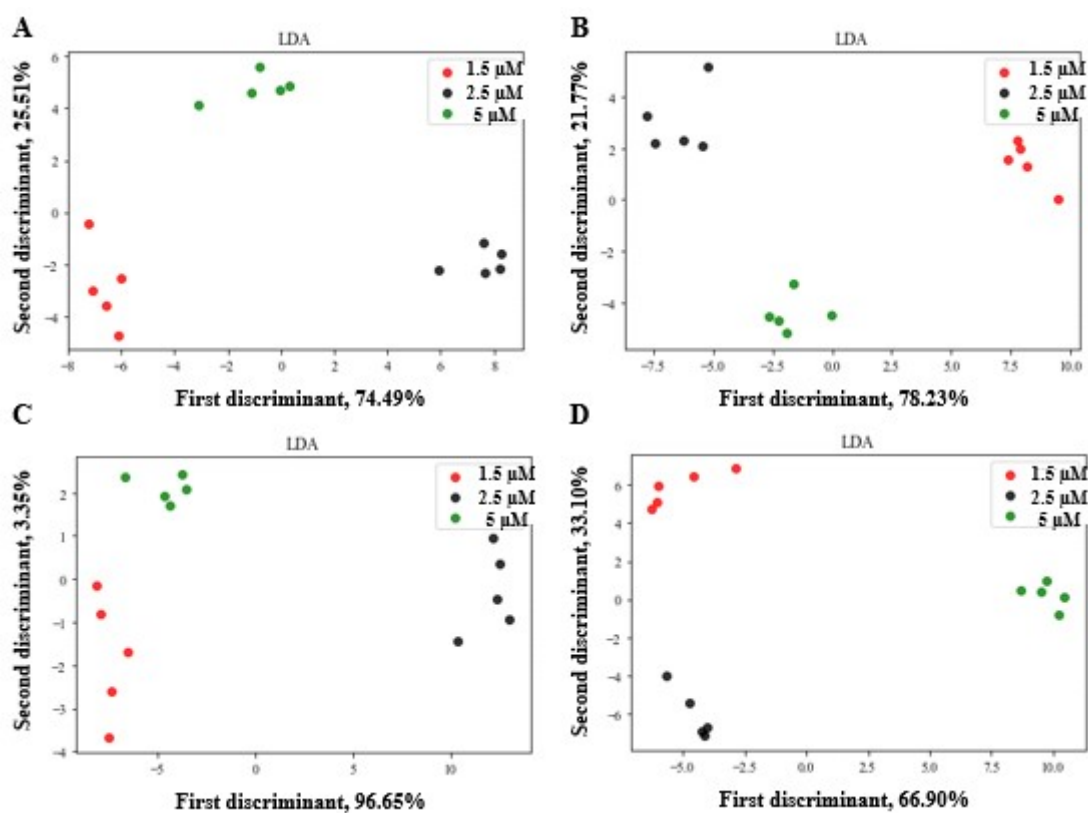

**Fig. S5** Nanozyme sensor array for metal ions semi-quantification. Two-dimensional LDA score plots at different concentrations of 1.5  $\mu\text{M}$ , 2.5  $\mu\text{M}$ , and 5  $\mu\text{M}$  of, (A)  $\text{Cu}^{2+}$ , (B)  $\text{Ag}^+$ , (C)  $\text{Cd}^{2+}$ , and (D)

Pb<sup>2+</sup> metal ions.

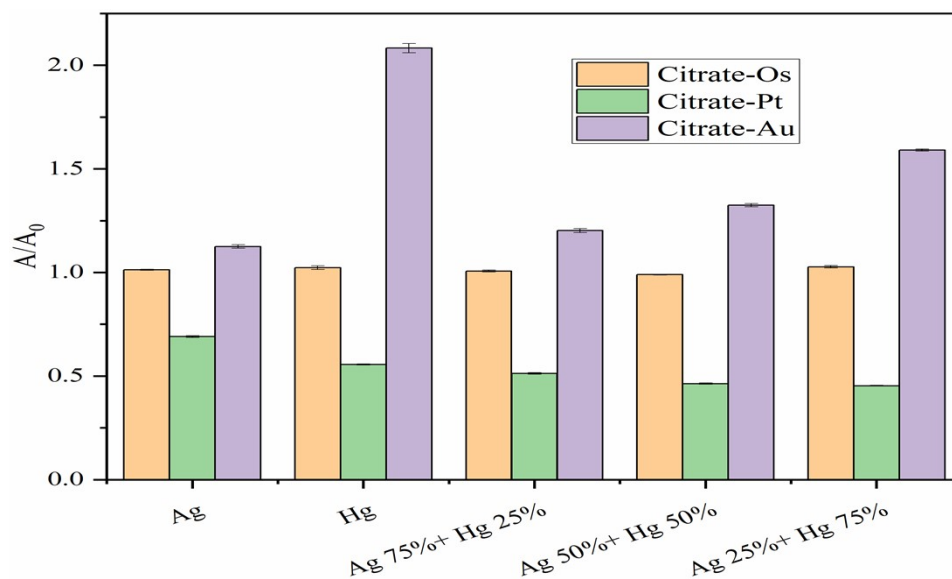

**Fig. S6** Colorimetric response patterns ( $A/A_0$ ) of nanozyme sensor array towards the mixtures of  $Ag^+$  and  $Hg^{2+}$  at different molar ratios in tap water. Each error bar shows the standard errors of five measurements.  $A$  and  $A_0$  were the absorption of oxidized TMB in the presence and absence of metal ions in the nanozyme reaction systems, respectively.

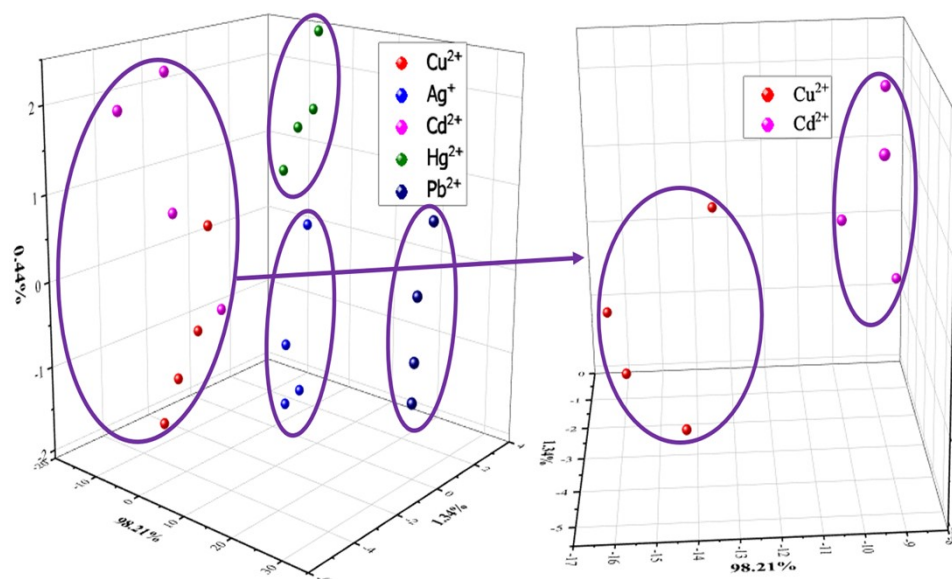

**Fig. S7** Nanozyme sensor array for HMIs detection in SiYu lake water at 2.5  $\mu$ M using three-dimensional LDA score plots.
